# Supplementary material for: Nano-drug System Based on Hierarchical Drug Release for Deep Localized/Systematic Cascade Tumor Therapy Stimulating Antitumor Immune Responses
Source: PubMed Central journal article supplement — Theranostics. 2019 May 4;9(10):2897–909. doi: 10.7150/thno.33534 (PMC6568183; doi:10.7150/thno.33534), 2019-05-04
Supplement: thnov09p2897s1.pdf [file thnov09p2897s1.pdf]

## Supporting Information

### Nano-drug System Based on Hierarchical Drug Release for Deep Localized/Systematic Cascade Tumor Therapy Stimulating Antitumor Immune Responses

Yuchu He<sup>1,2</sup>, Cong Cong<sup>1</sup>, Xiaoling Li<sup>1</sup>, Ruiyan Zhu<sup>1,3</sup>, Anshuo Li<sup>4</sup>, Shuxian Zhao<sup>1</sup>,  
Xiaowei Li<sup>1</sup>, Xin Cheng<sup>1</sup>, Mengxue Yang<sup>1</sup>, Dawei Gao<sup>1,2\*</sup>

<sup>1</sup>Applying Chemistry Key Lab of Hebei Province, Department of Bioengineer, Yanshan  
University, No.438 Hebei Street, Qinhuangdao, 066004, China.

<sup>2</sup>State Key Laboratory of Metastable Materials Science and Technology, Yanshan University,  
Qinhuangdao 066004, P. R. China.

<sup>3</sup>Hebei Province Asparagus Industry Technology Research Institute, Qinhuangdao, 066004, China.

<sup>4</sup>Department of Prosthodontics Ninth People's Hospital Shanghai Jiao Tong University School of  
Medicine, 639 Zhizaoju Road, Shanghai 200011, China.

\*Corresponding author: Prof. Dawei Gao, Tel: (+86)13930338376.

E-mail: [dwgao@ysu.edu.cn](mailto:dwgao@ysu.edu.cn)

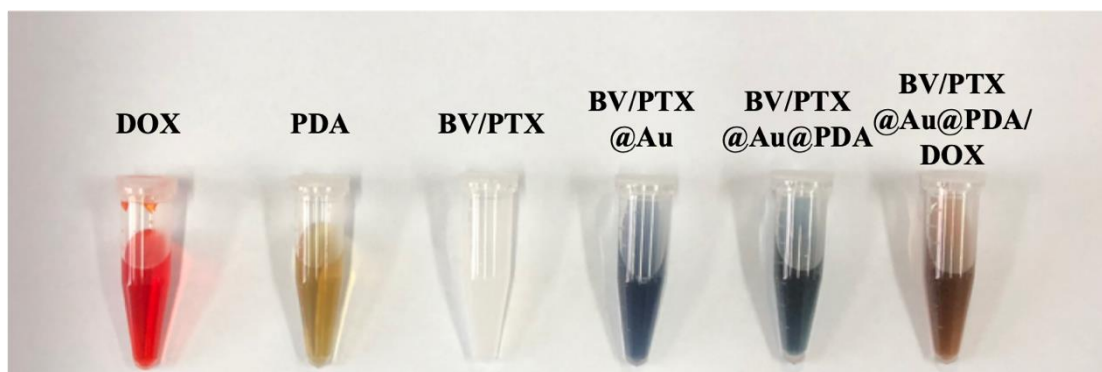

**Figure S1.** Photographs of free DOX, PDA, BV/PTX, BV/PTX@Au, BV/PTX@Au@PDA and BV/PTX@Au@PDA/DOX.

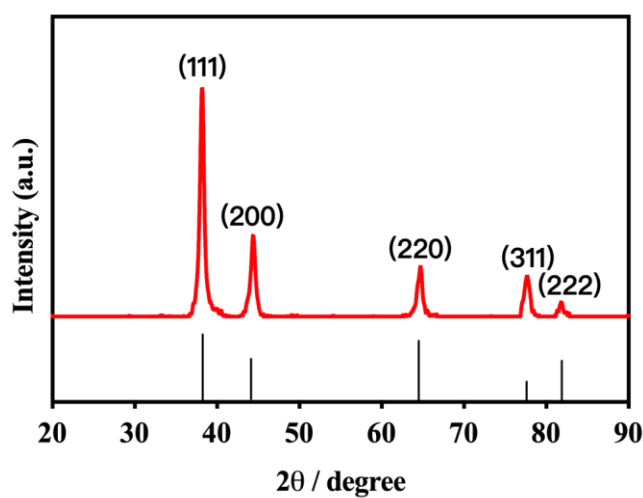

**Figure S2.** XRD pattern of BV/PTX@Au.

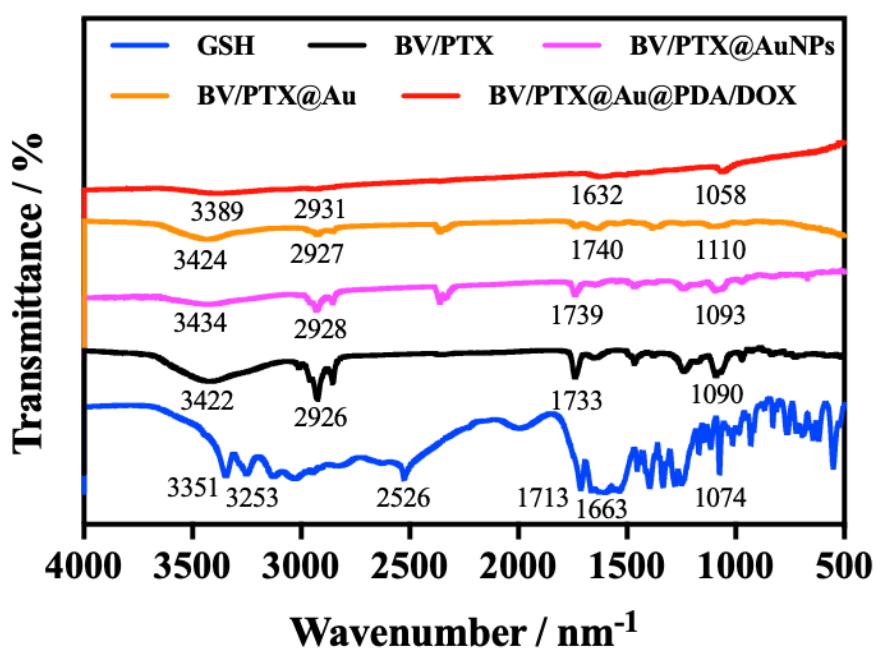

**Figure S3.** FTIR of free GSH, BV/PTX, BV/PTX@AuNPs, BV/PTX@Au and BV/PTX@Au@PDA/DOX.

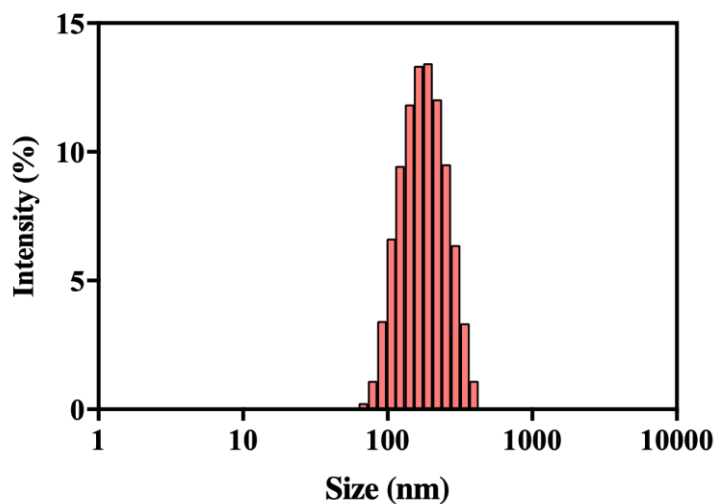

Figure S4. Size distribution of BV/PTX.

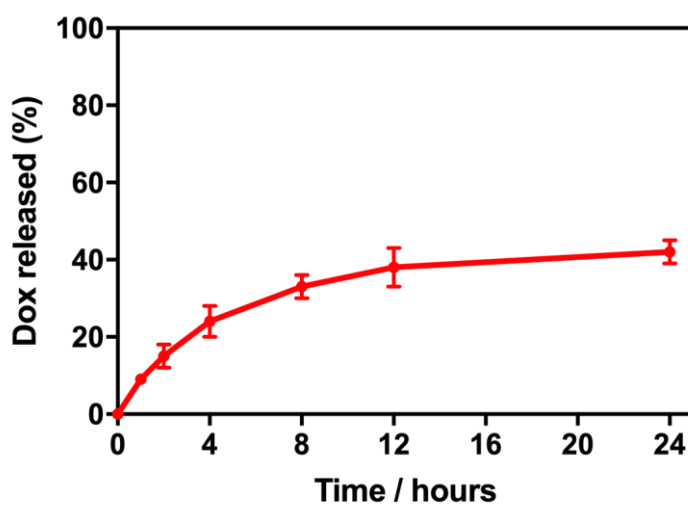

Figure S5. DOX release profile from BV/PTX@Au@PDA/DOX at pH 7.4 +10% FBS

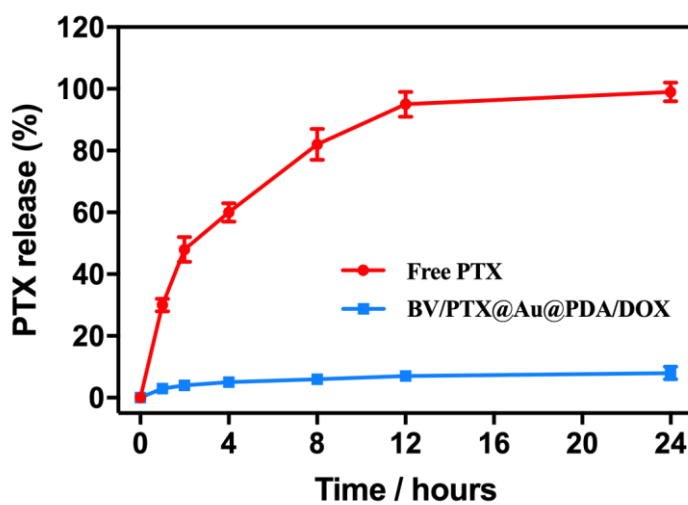

Figure S6. PTX release profile of free PTX and BV/PTX@Au@PDA/DOX.

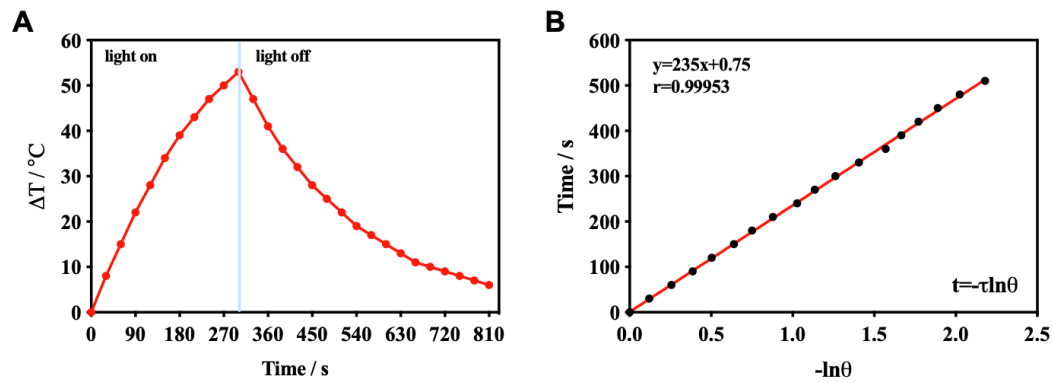

**Figure S7.** (A) The photothermal response of the BV/PTX@Au@PDA/DOX for 300 s with laser irradiation, and then the laser was shut off. (B) Linear time data versus  $-\ln\theta$  ( $R=0.99953$ ).

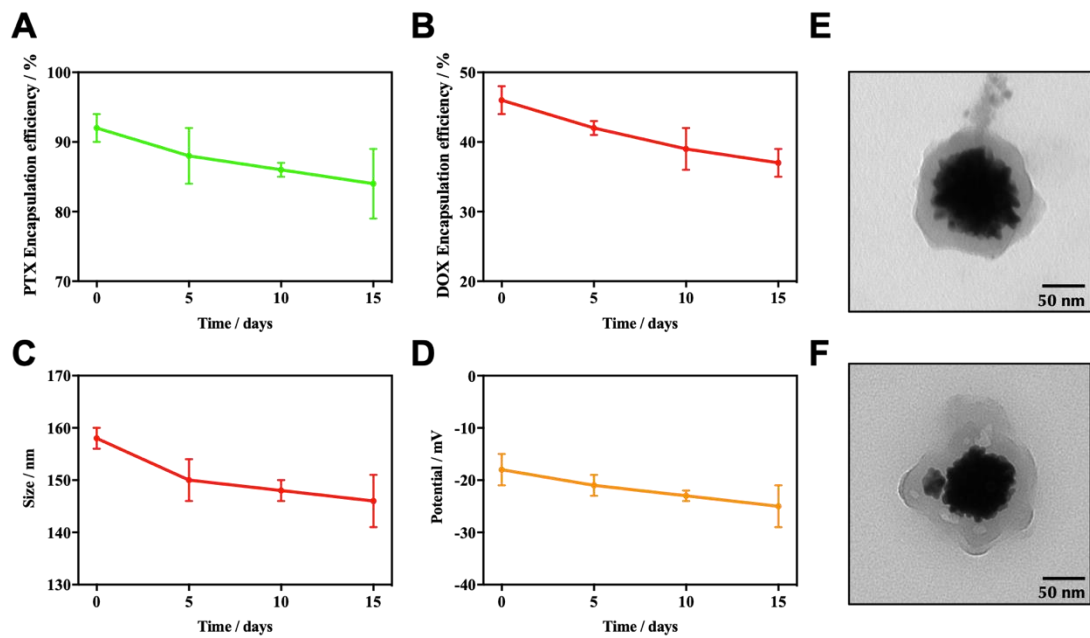

**Figure S8.** (A) PTX and (B) DOX leakage at 4°C for 15 days. The change of (C) size distribution and (D) zeta potential for 15 days. (E) and (F) TEM images before and after storage at 4°C for 15 days. Data were expressed as mean  $\pm$  S.E. ( $n = 3$ ).

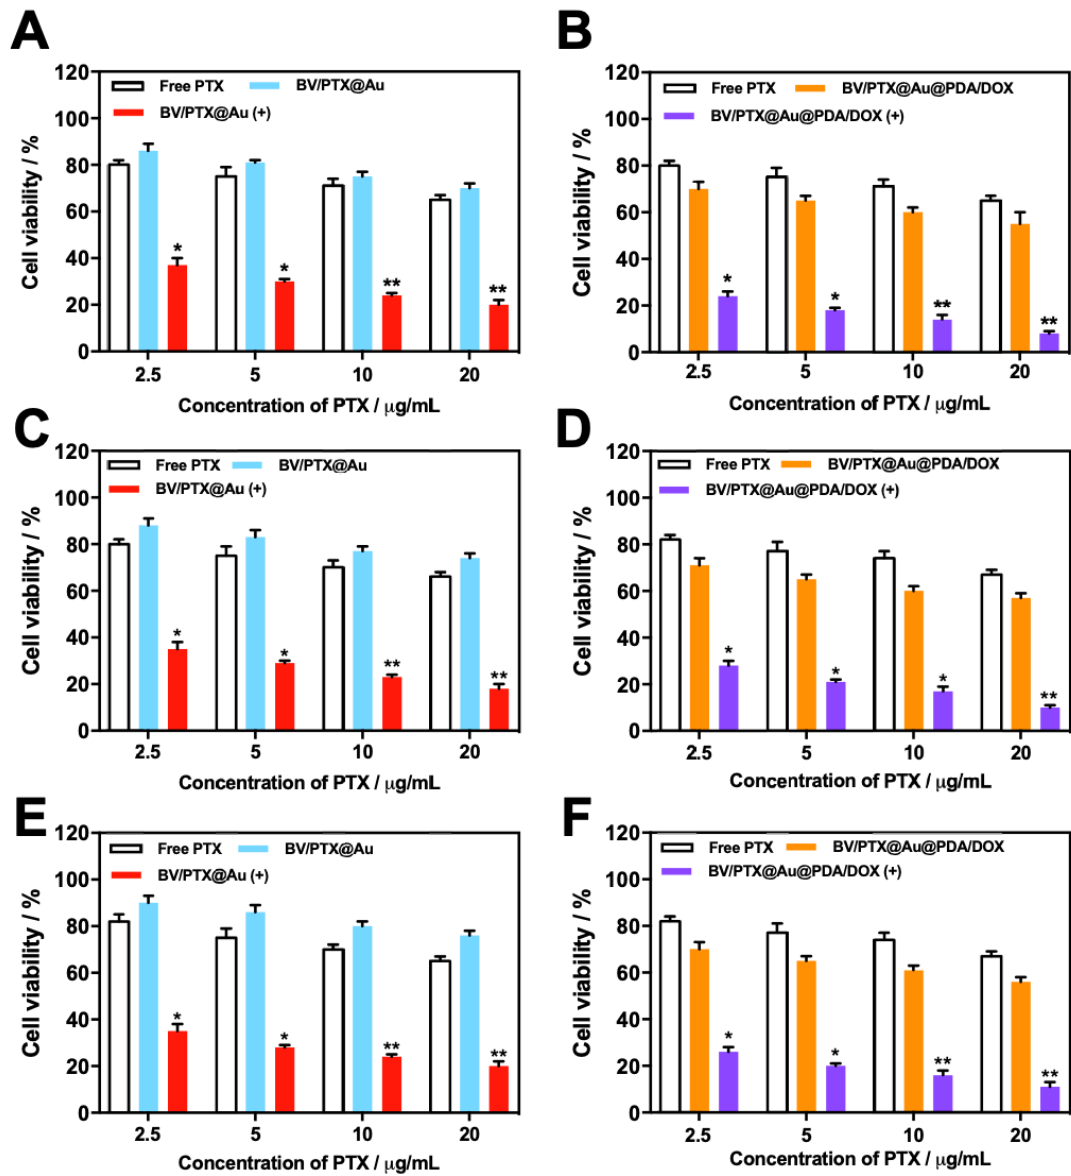

**Figure S9.** Cell viability of HeLa cells treated with free PTX, (A) BV/PTX@Au and (B) BV/PTX@Au@PDA/DOX with and without laser irradiation for 24 hours, (C) BV/PTX@Au and (D) BV/PTX@Au@PDA/DOX with and without laser irradiation for 48 hours and (E) BV/PTX@Au and (F) BV/PTX@Au@PDA/DOX with and without laser irradiation for 72 hours.

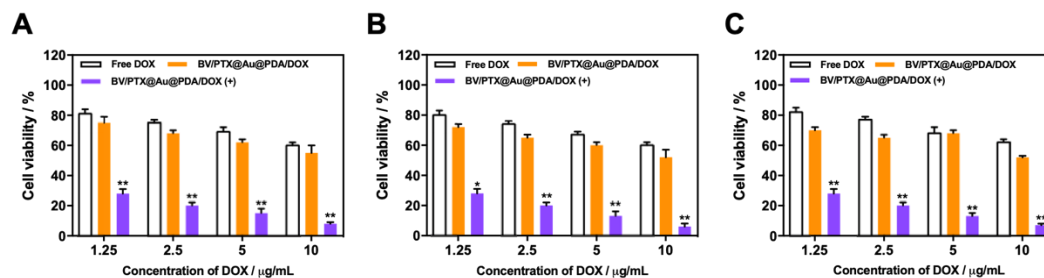

**Figure S10.** Cell viability of HeLa cells treated with free DOX and BV/PTX@Au@PDA/DOX with and without laser irradiation for (A) 24 hours, (B) 48 hours and (C) 72 hours.

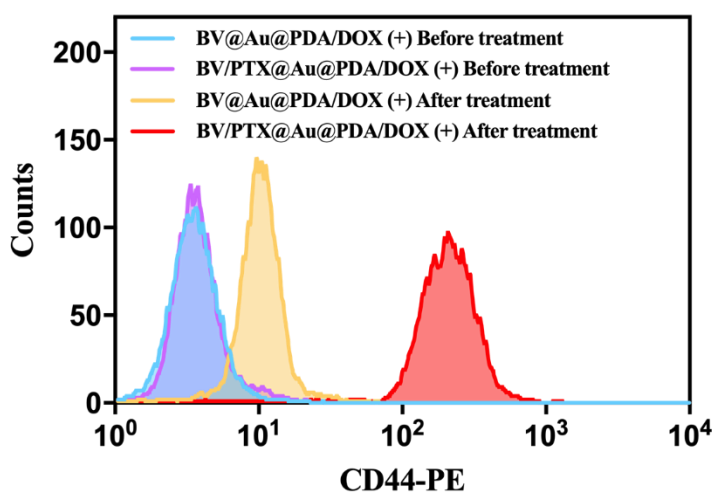

**Figure S11.** CD44 expression of BV@Au@PDA/DOX with laser irradiation and BV/PTX@Au@PDA/DOX with laser irradiation before and after first treatment by FCM analysis.

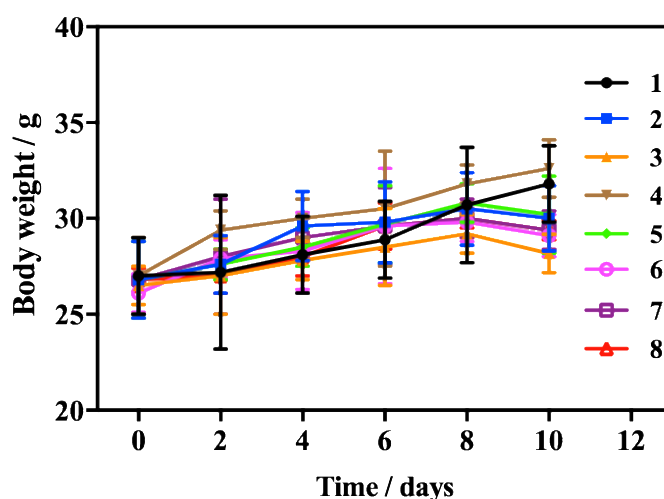

**Figure S12.** Body weight changes of different groups in the therapeutic period. Group 1: saline, 2: BV/PTX, 3: BV/PTX@Au, 4: BV/PTX@Au with laser irradiation, 5: BV@Au@PDA/DOX, 6: BV@Au@PDA/DOX with laser irradiation, 7: BV/PTX@Au@PDA/DOX, 8: BV/PTX@Au@PDA/DOX with laser irradiation.

## Tables

**Table S1** IC50 value of PTX with different formulations and incubation time

| IC50 value ( $\mu\text{g/mL}$ ) | 24 hours | 48 hours | 72 hours |
|---------------------------------|----------|----------|----------|
| Free PTX                        | 22.51    | 25.50    | 25.32    |
| BV/PTX@Au                       | 34.34    | 41.14    | 48.72    |
| BV/PTX@Au (+)                   | 2.07     | 1.90     | 1.93     |
| BV/PTX@Au@PDA/DOX               | 14.16    | 14.77    | 14.64    |
| BV/PTX@Au@PDA/DOX (+)           | 0.97     | 1.22     | 1.12     |

**Table S2** IC50 value of DOX with different formulations and incubation time

| IC50 value ( $\mu\text{g/mL}$ ) | 24 hours | 48 hours | 72 hours |
|---------------------------------|----------|----------|----------|
| Free DOX                        | 11.15    | 10.57    | 11.76    |
| BV/PTX@Au@PDA/DOX               | 7.93     | 6.86     | 6.74     |
| BV/PTX@Au@PDA/DOX (+)           | 0.58     | 0.55     | 0.56     |
